# Supplementary material for: Long-read Transcriptomics of Caviid Gammaherpesvirus 1: Compiling a Comprehensive RNA Atlas
Source: PubMed Central journal article supplement — bioRxiv. 2024 Dec 13:2024.12.11.627975. Preprint. [Version 1] doi: 10.1101/2024.12.11.627975 (PMC11661164; doi:10.1101/2024.12.11.627975), 2024-12-13
Supplement: NIHPP2024.12.11.627975v1-supplement-1.pdf [file NIHPP2024.12.11.627975v1-supplement-1.pdf]

## 729 **Supplemental Figure and Tables**

730 **Supplemental Figure 1.** Upstream ORFs in the ORF35 transcript

731 **Supplemental Table 1.** Statistics of the Oxford Nanopore PromethION dcDNA and dRNA  
732 sequencing.

733 **Supplemental Table 2.** Positions of the TSSs, their sample-specific abundances, and associated  
734 promoter elements.

735 **Supplemental Table 3.** Positions of the TESs, their abundances in each sample, and the associated  
736 poly(A) signals.

737 **Supplemental Table 4.** The positions of introns and their abundances across different samples.

738 **Supplemental Table 5.** List of spliced (A), non-spliced (B) transcripts detected by LoRTIA, and  
739 replication-associated RNAs (C) including their binding energies and target genes.

740 **Supplemental Table 6.** Access identifiers for fastq files generated by long-read sequencing,  
741 available in the European Nucleotide Archive (ENA) database.
